# Supplementary material for: Analysis of SPI as a Drought Indicator during the Maize Growing Period in the Çukurova Region (Turkey)
Source: MDPI journal article supplement (doi:10.3390/su14063697), 2022-03-21
Supplement: s1 [file s1]

**Supplementary S1**—Changes in long annual total precipitation (Pt) and average temperature (Tave) during each maize growth period in three provinces (Adana, Mersin, Osmaniye)

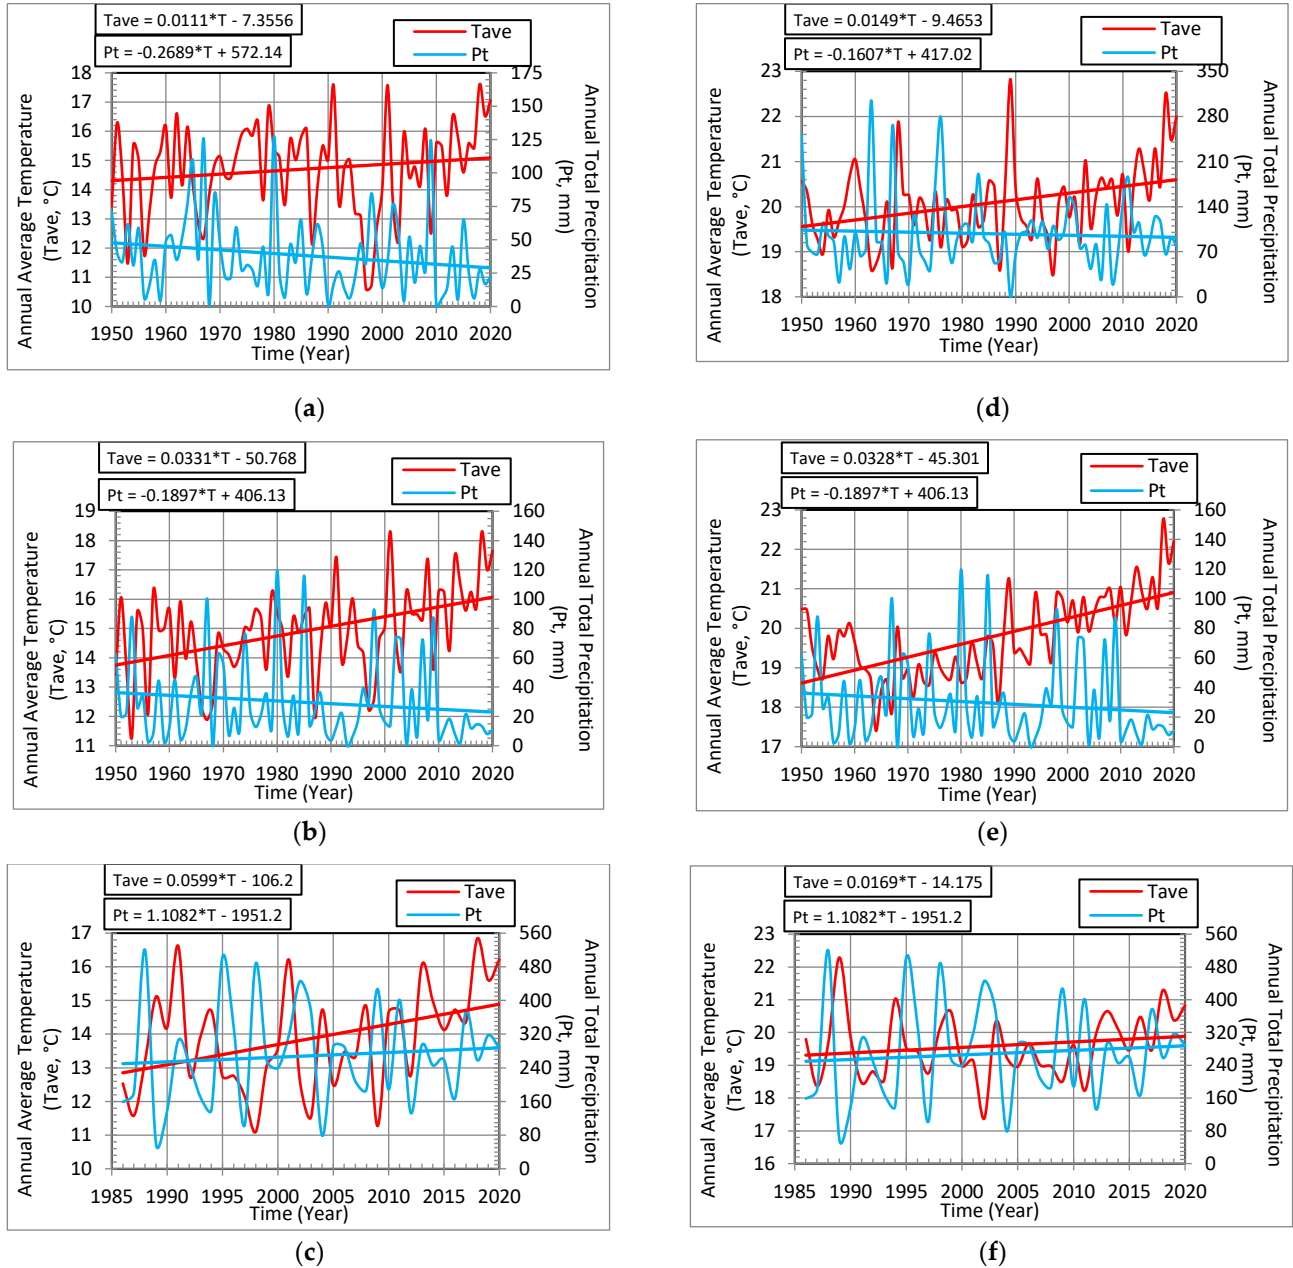

**Figure S1.** Changes of Pt and Tave values during (a) germination period in Adana; (b) germination period in Mersin; (c) germination period in Osmaniye; (d) seedling-tassel emergence period in Adana; (e) seedling-tassel emergence period in Mersin; (f) seedling-tassel emergence period in Osmaniye;

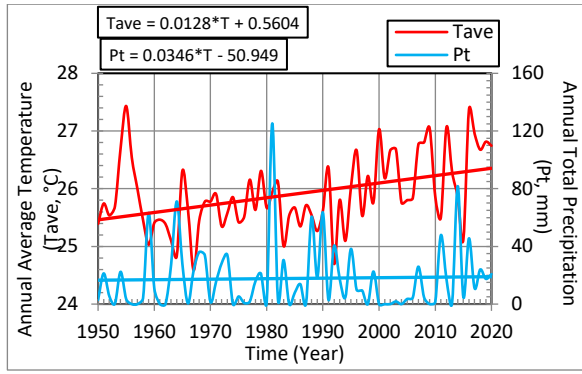

(a)

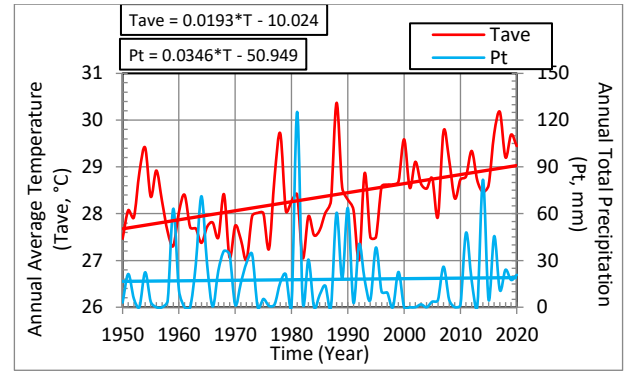

(d)

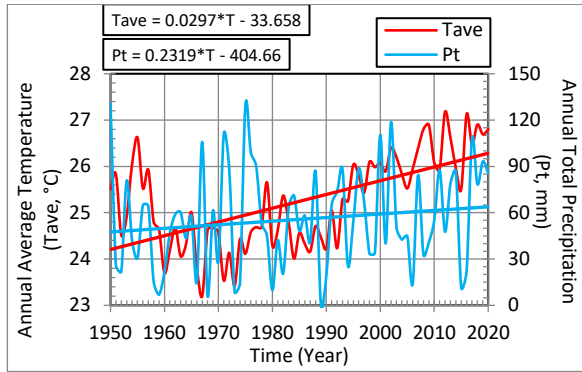

(b)

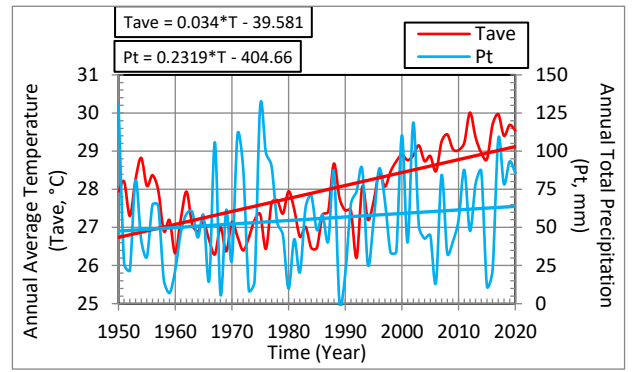

(e)

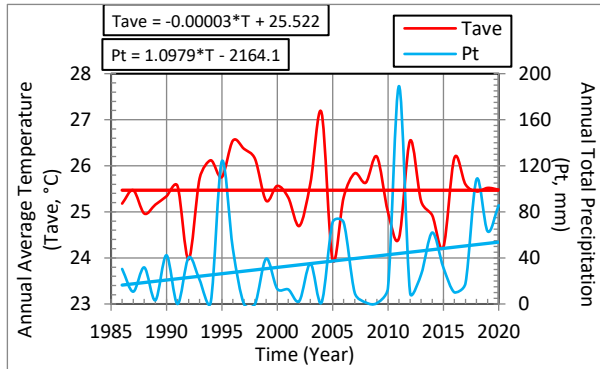

(c)

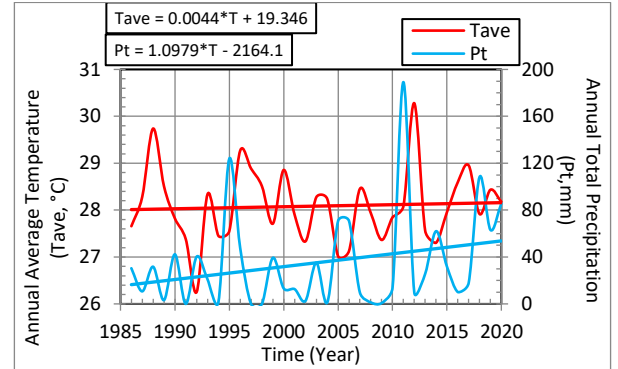

(f)

**Figure S2.** Changes of Pt and Tave values during (a) tassell-cob period in Adana; (b) tassell-cob period in Mersin; (c) tassell-cob period in Osmaniye; (d) formation-maturation period in Adana; (e) formation-maturation period in Mersin; (f) formation-maturation period in Osmaniye;

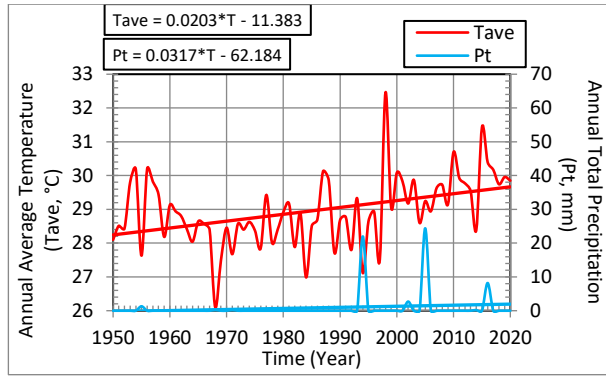

(a)

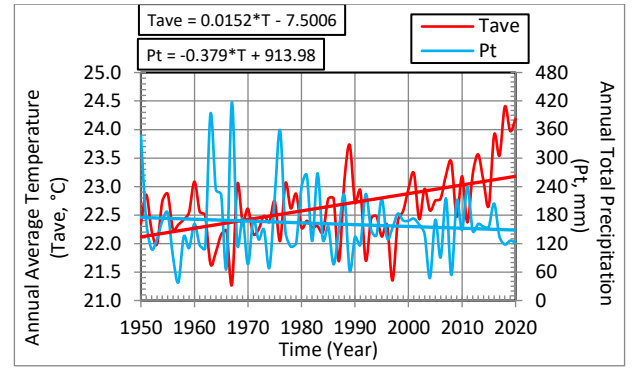

(d)

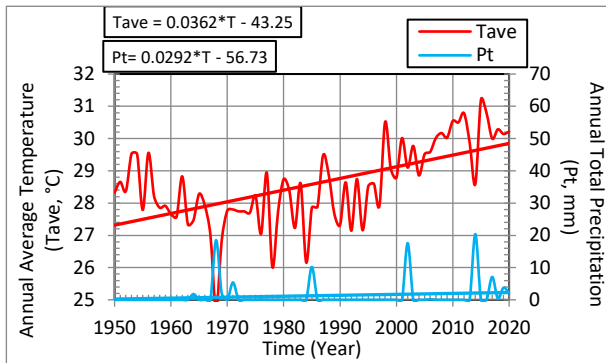

(b)

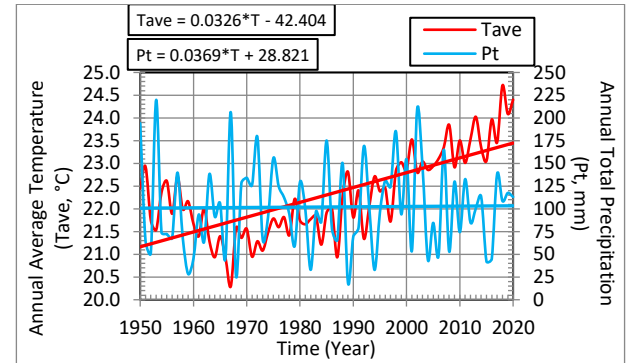

(e)

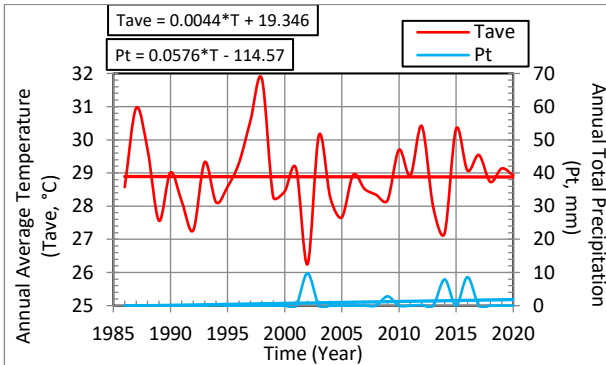

(c)

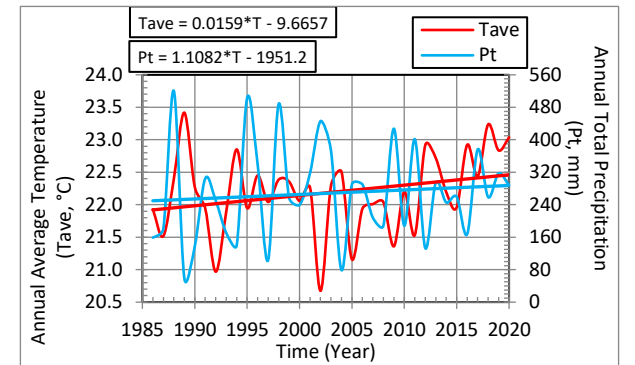

(f)

**Figure S3.** Changes of Pt and Tave values during (a) harvest period in Adana; (b) harvest period in Mersin; (c) harvest period in Osmaniye; (d) the total period of maize growth in Adana; (e) the total period of maize growth in Mersin; (f) the total period of maize growth in Osmaniye;
